# Supplementary material
Source: PubMed Central journal article supplement (PMC4144786)

# Supp. Figure 1.

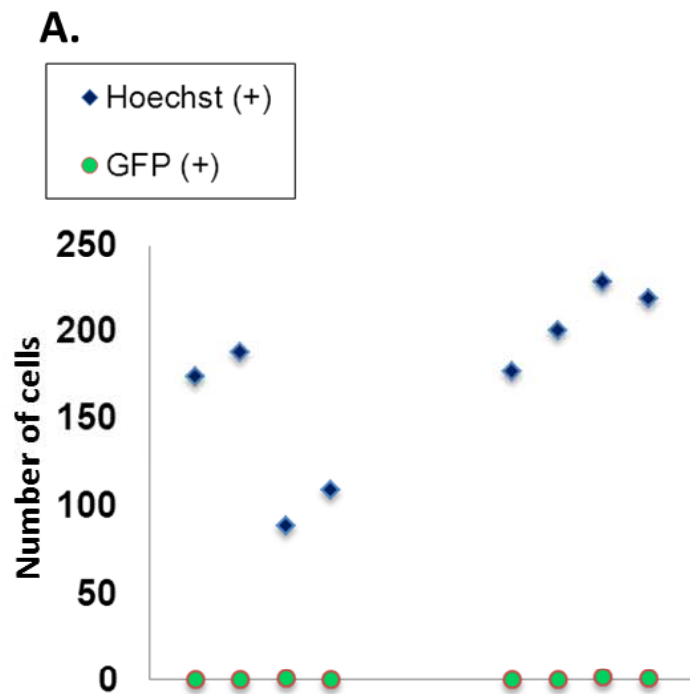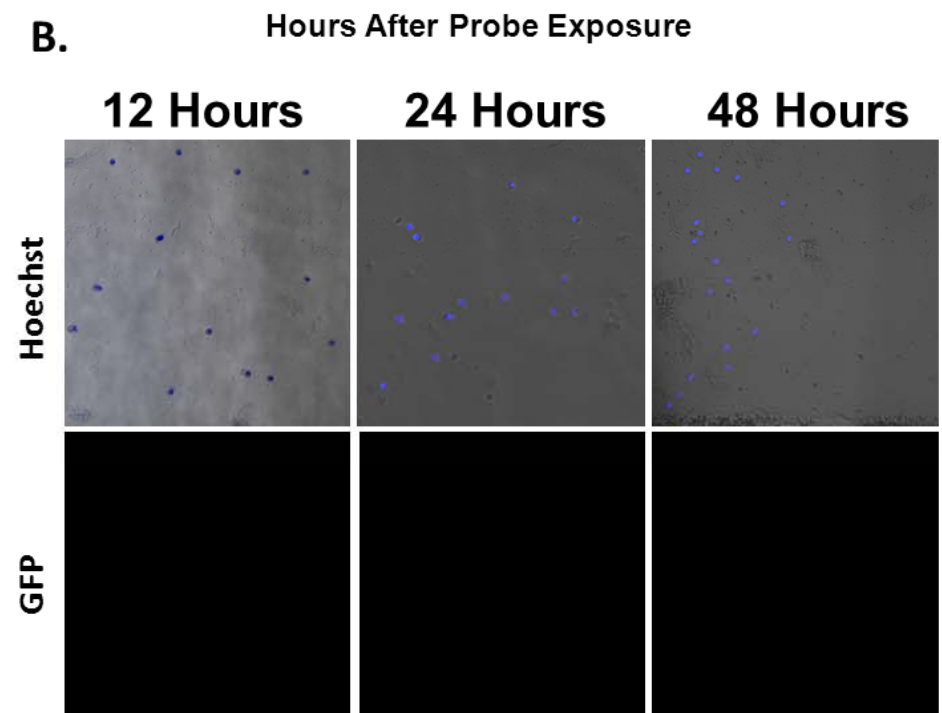

Supplement: NIHMS617651-supplement-Supp_Fig_1.pdf [file NIHMS617651-supplement-Supp_Fig_1.pdf]

## Supp. Figure 2.

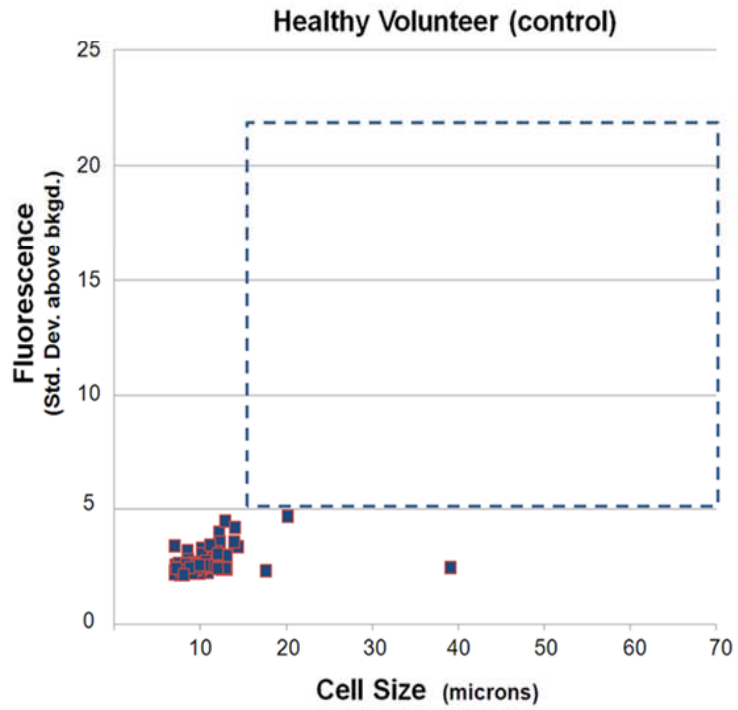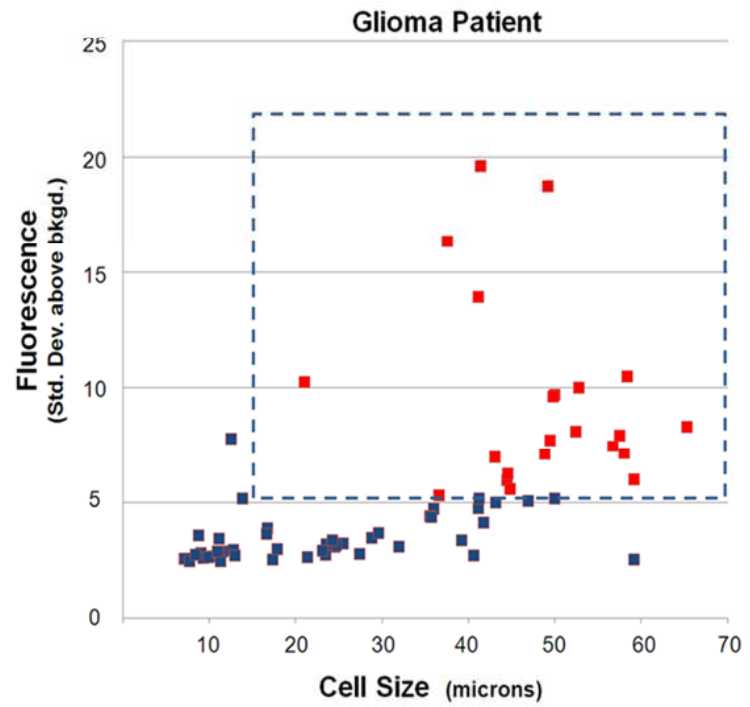

Supplement: NIHMS617651-supplement-Supp_Fig_2.pdf [file NIHMS617651-supplement-Supp_Fig_2.pdf]

### Supp. Figure 3.

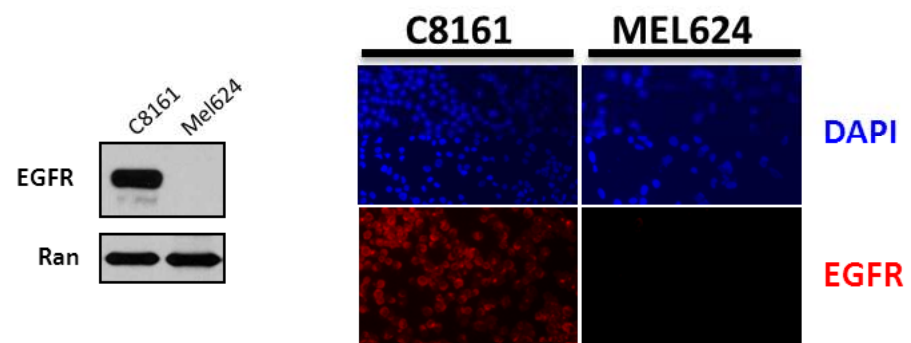

Supplement: NIHMS617651-supplement-Supp_Fig_3.pdf [file NIHMS617651-supplement-Supp_Fig_3.pdf]

Supp. Figure 4.

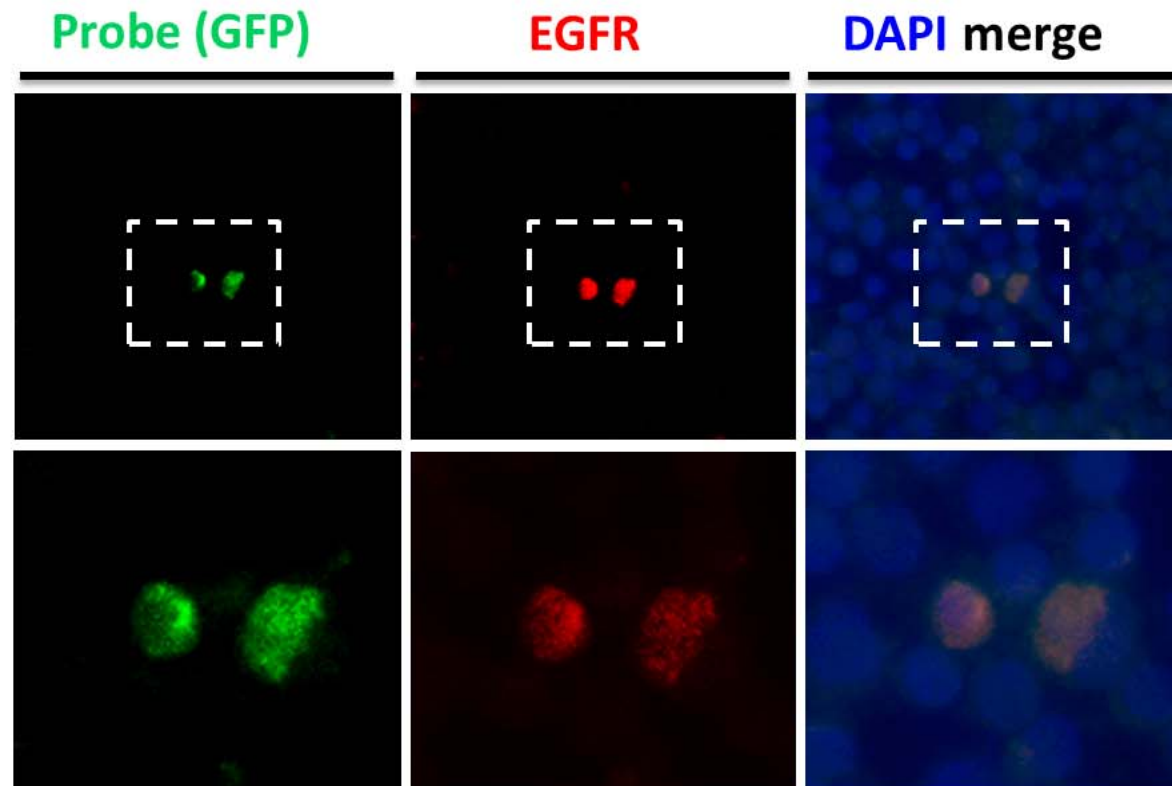

Supplement: NIHMS617651-supplement-Supp_Fig_4.pdf [file NIHMS617651-supplement-Supp_Fig_4.pdf]

Supp. Figure 5.

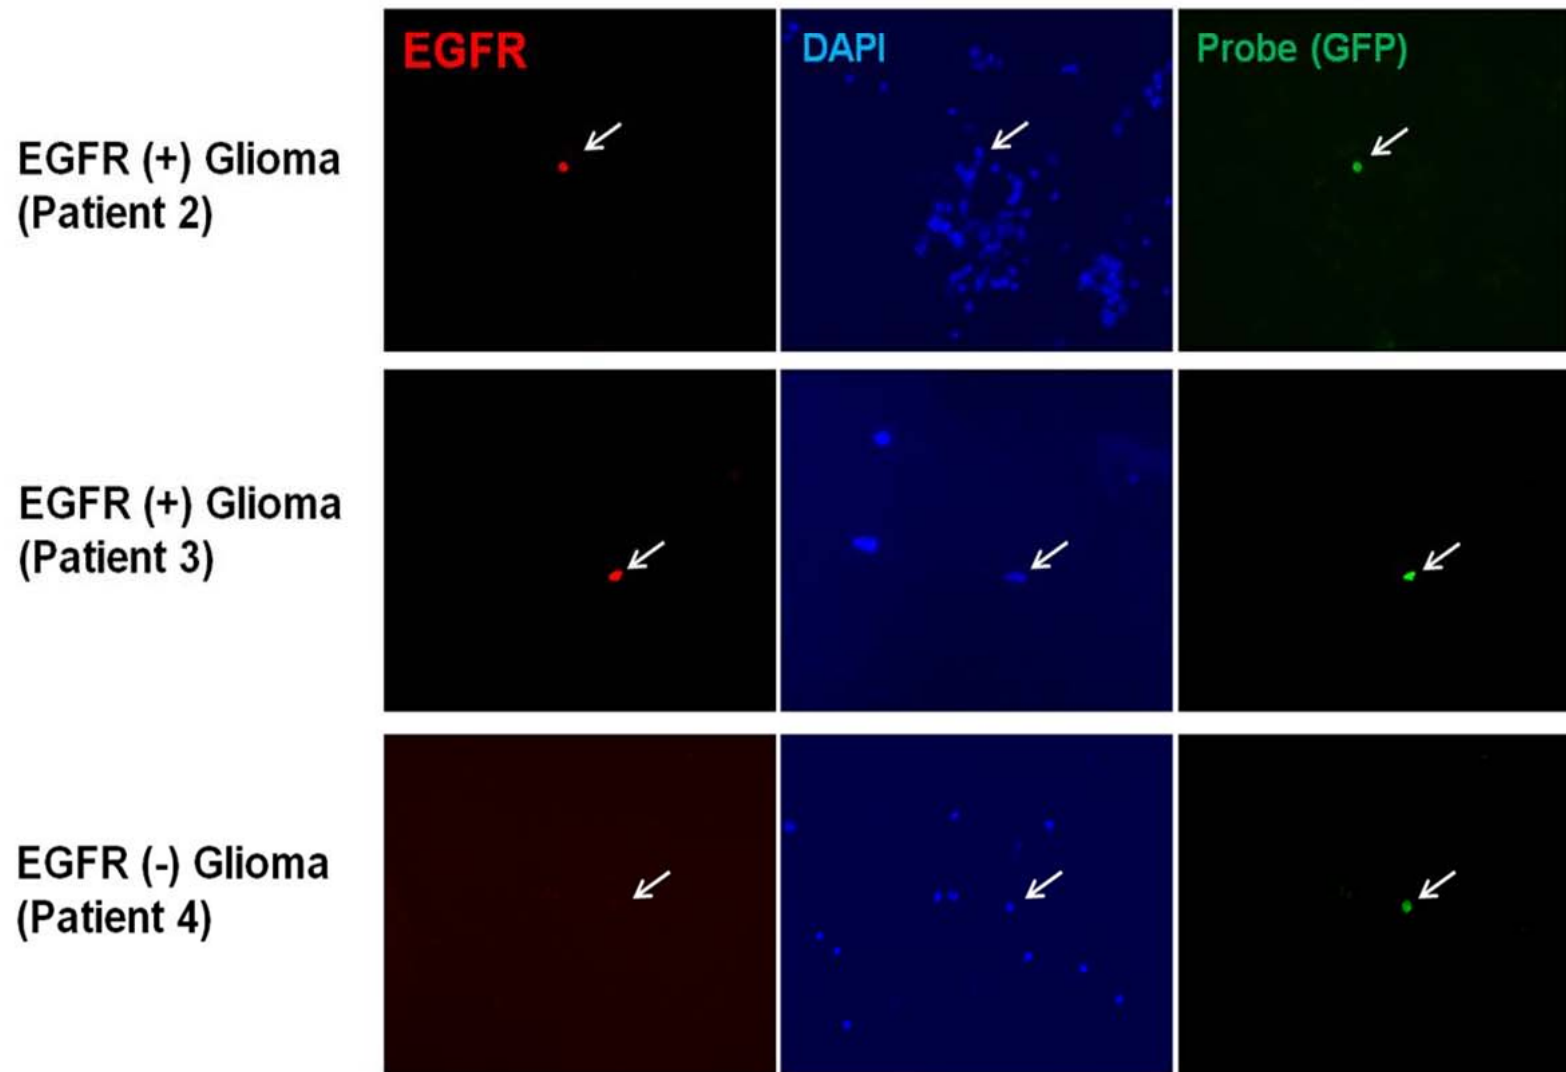

Supplement: NIHMS617651-supplement-Supp_Fig_5.pdf [file NIHMS617651-supplement-Supp_Fig_5.pdf]

Supp. Figure 6.

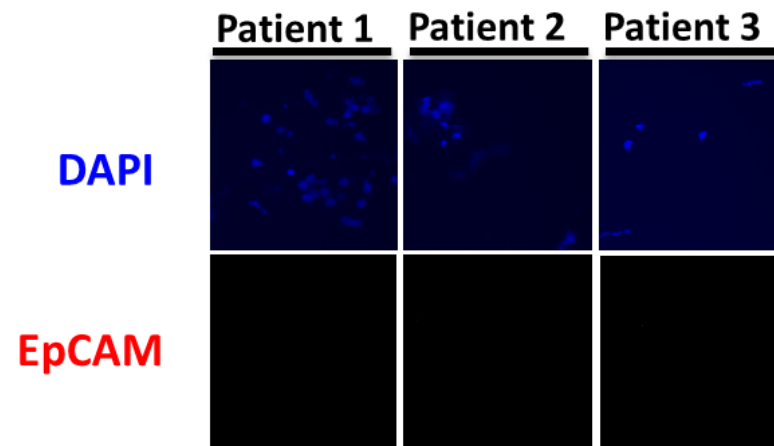

Supplement: NIHMS617651-supplement-Supp_Fig_6.pdf [file NIHMS617651-supplement-Supp_Fig_6.pdf]
